# Supplementary material for: Harnessing lattice oxygens in a high-entropy perovskite oxide for enhanced oxygen evolution reaction
Source: Royal Society of Chemistry journal article supplement (doi:10.1039/d4se01204f), 2024-10-02
Supplement: d4se01204f1.pdf [file d4se01204f1.pdf]

## Supplementary information

# Harnessing lattice oxygens in a high-entropy perovskite oxide for enhanced oxygen evolution reaction

*Sujan Sen<sup>a</sup> and Tapas Kumar Mandal<sup>\*ab</sup>*

<sup>a</sup>Department of Chemistry, Indian Institute of Technology Roorkee, Roorkee – 247667, India

<sup>b</sup>Center for Nanotechnology, Indian Institute of Technology Roorkee, Roorkee – 247667, India

### Corresponding Author

\*Email: [tapas.mandal@cy.iitr.ac.in](mailto:tapas.mandal@cy.iitr.ac.in).

**Table S1** Refined lattice parameters and reliability factors of BSCTRS.

| parameter          | value        |
|--------------------|--------------|
| Space group        | $Pm\bar{3}m$ |
| $a$ (Å)            | 3.9850 (1)   |
| Sr/Ba–O (Å)        | 2.8178 (1)   |
| Co/Ti/Ru/Sb–O (Å)  | 1.9925 (1)   |
| $R_{\text{Bragg}}$ | 1.38         |
| $R_{\text{F}}$     | 5.29         |
| $R_{\text{p}}$     | 1.43         |
| $R_{\text{wp}}$    | 1.97         |
| $\chi^2$           | 4.24         |

**Table S2** Atomic sites, occupancies, positions, and thermal parameters of BSCTRS.

| atom        | Wyckoff site | $x$ | $y$ | $z$ | S.O.F.                | $B_{\text{iso}}$ |
|-------------|--------------|-----|-----|-----|-----------------------|------------------|
| Ba/Sr       | 1b           | 0.5 | 0.5 | 0.5 | 0.33/0.67             | 0.67             |
| Co/Ti/Ru/Sb | 1a           | 0   | 0   | 0   | 0.33/0.165/0.165/0.33 | 0.85             |
| O           | 3d           | 0.5 | 0   | 0   | 1                     | 0.97             |

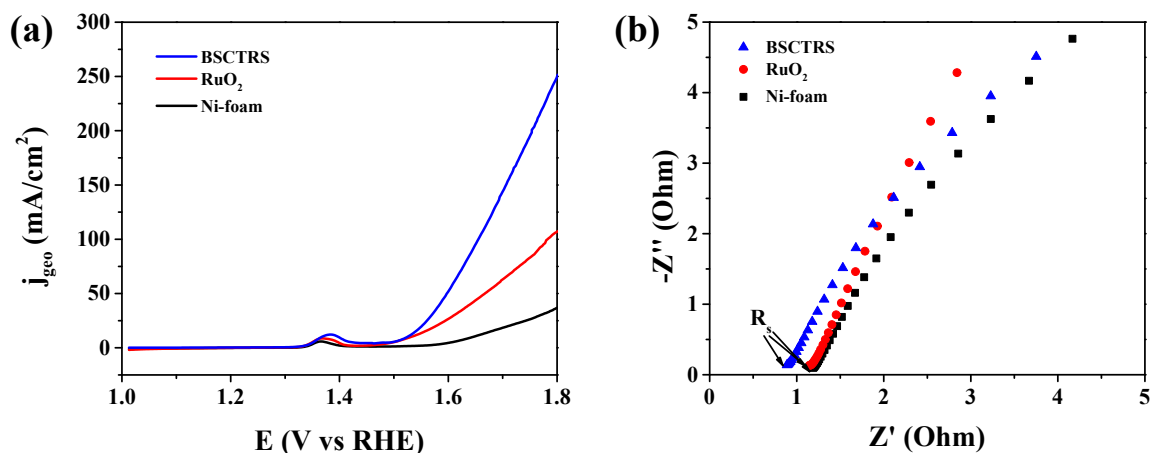

Fig. S1 (a) LSV curves without iR-correction. (b) EIS Nyquist plots.

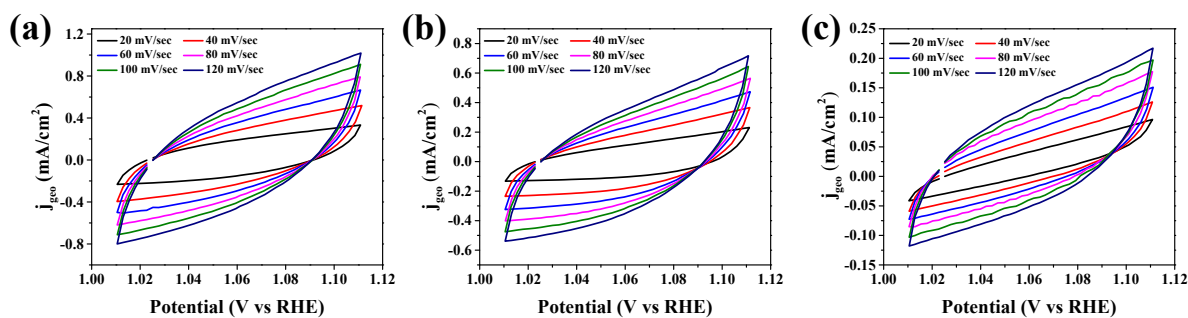

Fig. S2 CV of (a) BSCTRS, (b) RuO<sub>2</sub>, and (c) NF in the non-Faradaic region.

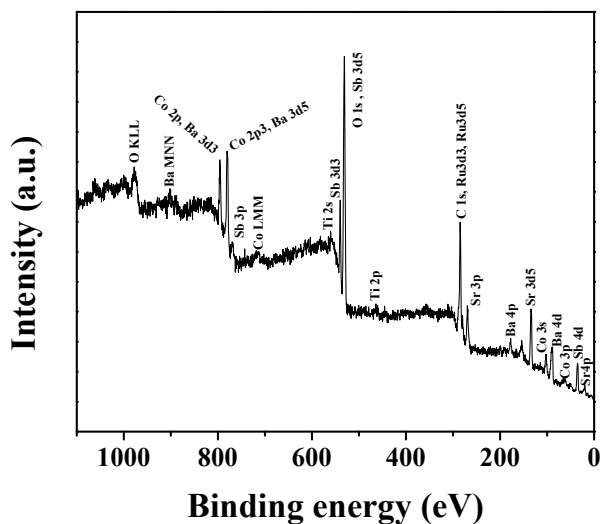

Fig. S3 XPS survey spectra of BSCTRS.

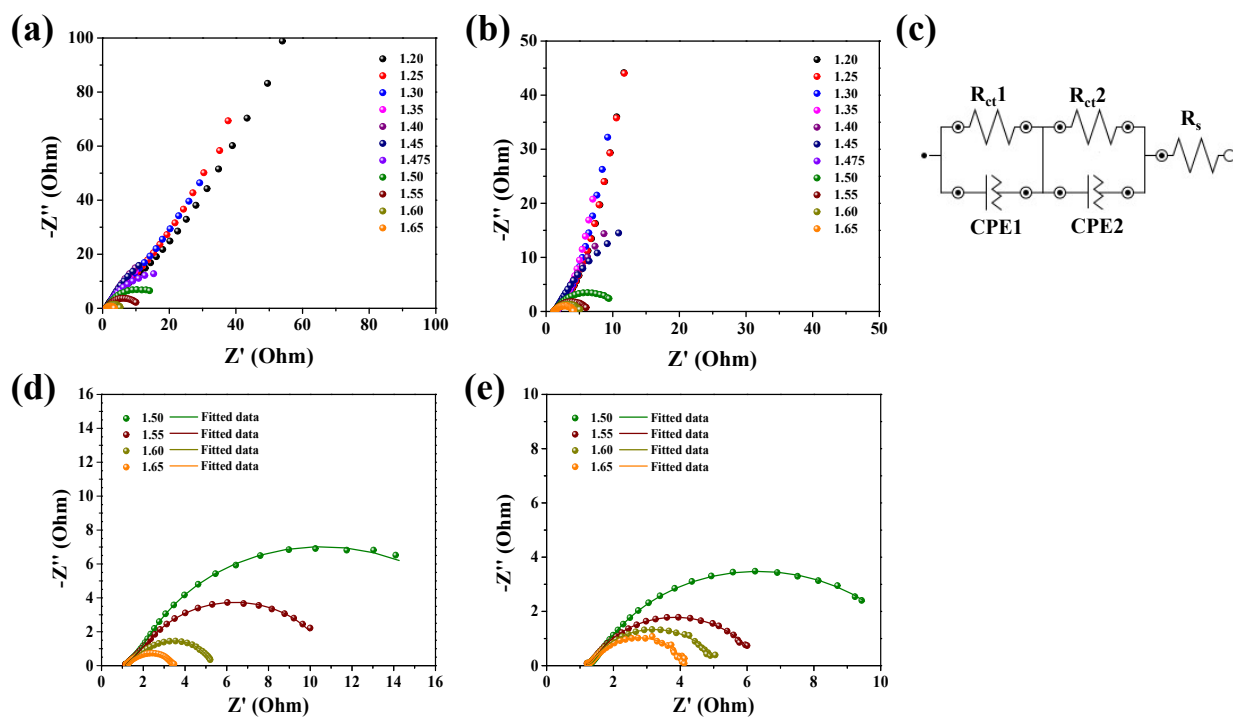

**Fig. S4** EIS Nyquist plots of (a) BSCTRS and (b) RuO<sub>2</sub> at different potential ranging from 1.20 to 1.65 V vs RHE, (c) Equivalent circuit diagram. EIS Nyquist plot circuit fitting of (d) BSCTRS and (e) RuO<sub>2</sub> at potentials from 1.50 to 1.65 V vs RHE.

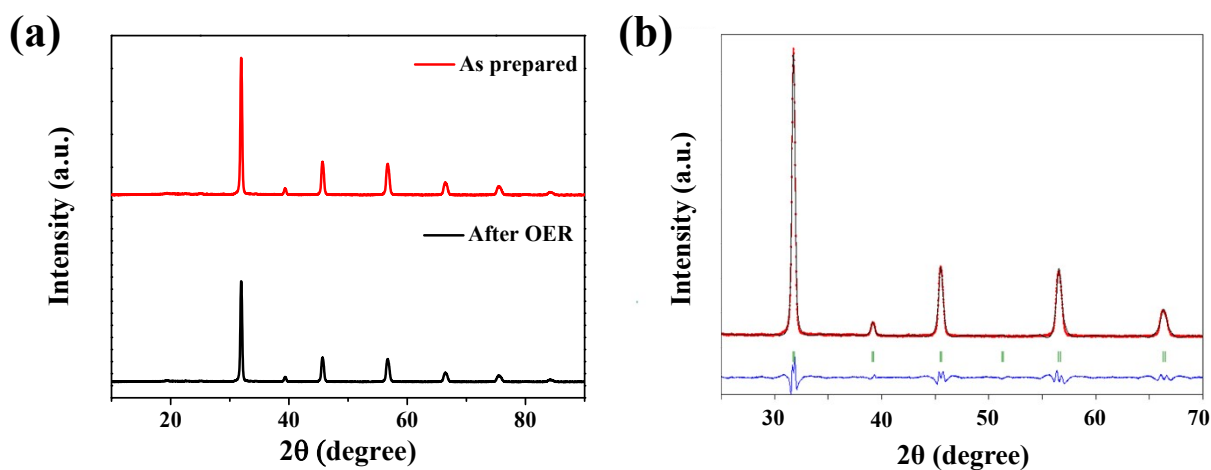

**Fig. S5** (a) As synthesized and post-catalytic PXRD patterns of BSCTRS. (b) Refinement profile of post-catalytic PXRD pattern using Le Bail method.

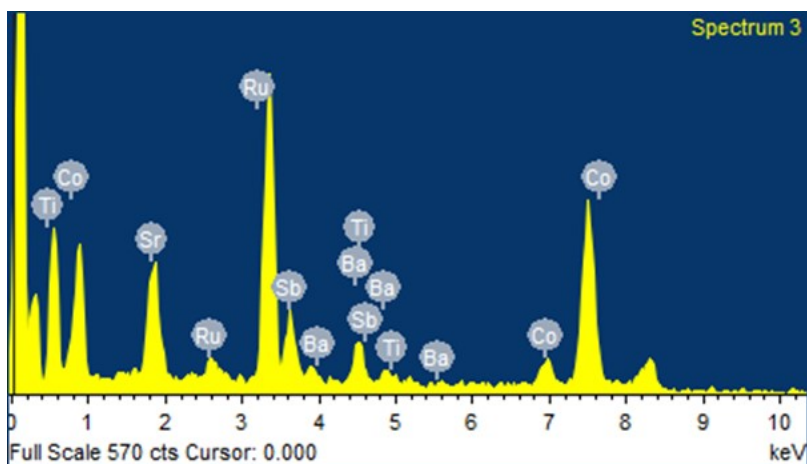

**Fig. S6** Post-catalytic EDS of BSCTRS.

**Table S3** MP-AES analysis of electrolyte after chronopotentiometry.

| Elements | concentration (mg/L) | percentage |
|----------|----------------------|------------|
| Ba       | 0.0137               | 0.03       |
| Sr       | 0.0517               | 0.09       |
| Co       | 0.0145               | 0.07       |
| Ti       | 0.0016               | 0.02       |
| Ru       | 0.0126               | 0.07       |
| Sb       | 0.0165               | 0.04       |

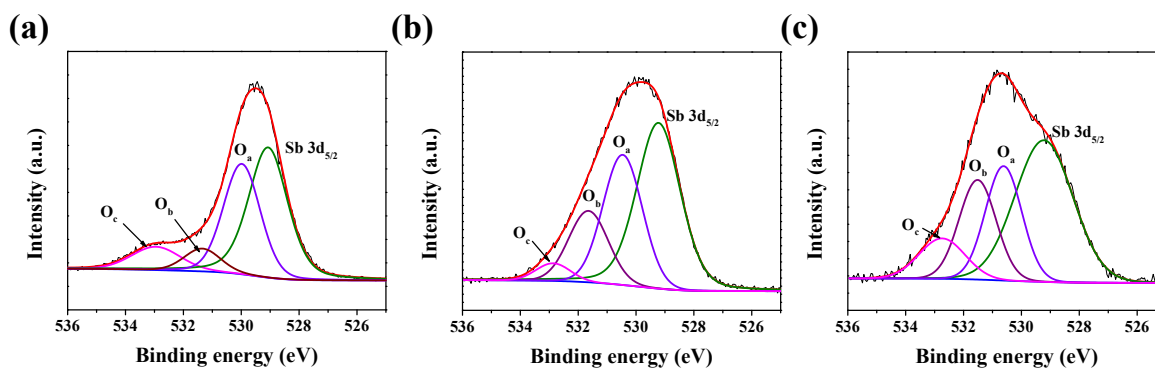

**Fig. S7** O 1s XPS spectra of BSCTRS (a) after treating at 1 M KOH solution, (b) after 10 CV cycles to activate the catalyst and (c) after performing chronopotentiometry.

**Table S4** Percentage of different oxygen species at different conditions from deconvoluted O1s XPS spectra.

| percentage of oxygen species | pristine | @ 1 M KOH | after 10 CV cycles | after chronopotentiometry |
|------------------------------|----------|-----------|--------------------|---------------------------|
| O <sub>a</sub>               | 56       | 60        | 60                 | 43                        |
| O <sub>b</sub>               | 37       | 17        | 33                 | 38                        |
| O <sub>c</sub>               | 7        | 23        | 7                  | 19                        |
